# Supplementary material for: Facet-energy inspired metal oxide extended hexapods decorated with graphene quantum dots: sensitive detection of bisphenol A in live cells
Source: Royal Society of Chemistry journal article supplement (doi:10.1039/c9nr10944g), 2020-01-01
Supplement: c9nr10944g1.pdf [file c9nr10944g1.pdf]

## Supporting information

### Facet-energy inspired metal oxide extended hexapod decorated with graphene quantum dots: Sensitive detection of bisphenol A in live cells

Ghazala Ashraf,<sup>1</sup> Muhammad Asif,<sup>1</sup> Ayesha Aziz,<sup>1</sup> Anh Quang Dao,<sup>2</sup> Tiansui Zhang,<sup>1</sup> Tayyaba Iftikhar,<sup>1</sup> Qin wang,<sup>1</sup> Hongfang Liu<sup>1\*</sup>

*1 Key Laboratory for Large-Format Battery Materials and System, Ministry of Education, Hubei*

*Key Laboratory of Material Chemistry and Service Failure, School of Chemistry and Chemical Engineering, Huazhong University of Science and Technology, Wuhan, 430074, P. R. China.*

*2 Institute of Research and Development, Duy Tan University, Danang 550000, Vietnam.*

**\*Corresponding Author:** liuhf@hust.edu.cn (H. Liu)

### Modification of the working electrode.

To modify the surface of glassy carbon electrode (GCE with 3 mm diameter), 0.3 and 0.05  $\mu\text{m}$  alumina slurry on micro cloth pads was used for polishing and then cleaned with doubly distilled (DD) water. Then, DD water and ethanol were used to wash GCE ultrasonically for one minute and desiccated under  $\text{N}_2$  gas purging. A homogeneous mixture of 2 mg of  $\text{Cu}_2\text{O-CuO@GQDs}$  composite in 1 mL of DD water was prepared under strong stirring. Next, 5  $\mu\text{l}$  of above suspension was dispensed on GCE polished surface and dried out at ambient temperature to make  $\text{Cu}_2\text{O-CuO @GQDs/GCE}$  for assessment of electroanalytical performances. The supplementary control materials were also used to modify GCE using the same practice.

**Table S1** Elemental composition with textural properties of a series of electrocatalysts

| Catalyst                            | $\text{Cu}_2\text{O}$<br>(mg) | GQDs used<br>(mg) | BET<br>( $\text{m}^2 \text{g}^{-1}$ ) |
|-------------------------------------|-------------------------------|-------------------|---------------------------------------|
| $\text{Cu}_2\text{O}$ NSs           | 20                            | 0                 | 27.21                                 |
| $\text{Cu}_2\text{O-CuO}$ EHPs      | 20                            | 0                 | 24.69                                 |
| $\text{Cu}_2\text{O-CuO @GQDs-I}$   | 20                            | 5                 | 50.78                                 |
| $\text{Cu}_2\text{O-CuO @GQDs-II}$  | 20                            | 7                 | 63.82                                 |
| $\text{Cu}_2\text{O-CuO @GQDs-III}$ | 20                            | 9                 | 54.11                                 |

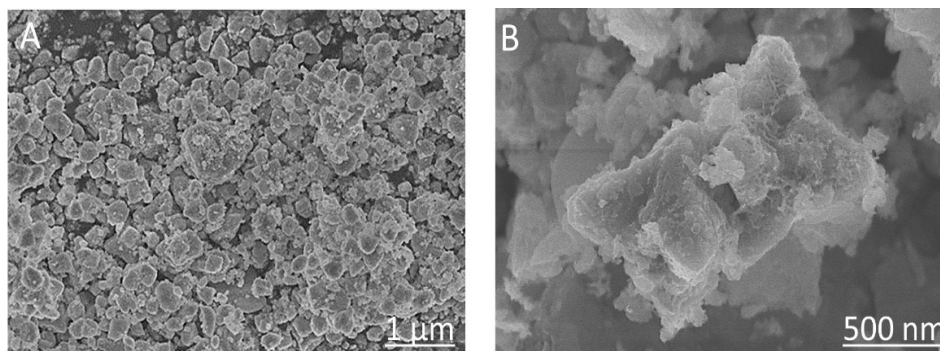

**Fig. S1.** (A and B) high and low magnification SEM images of  $\text{Cu}_2\text{O-CuO@GQDs (III)}$

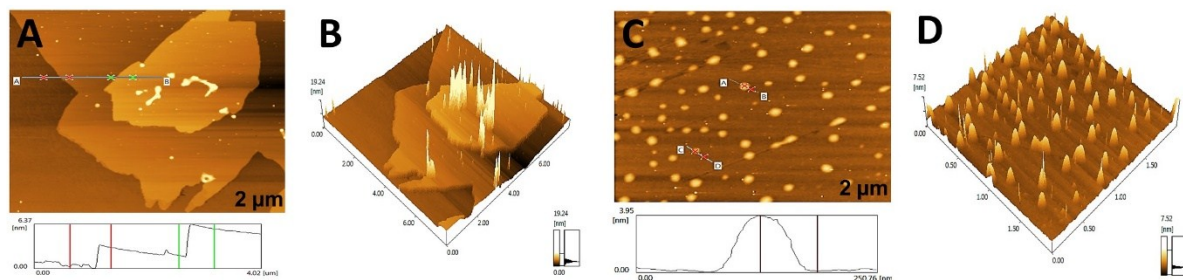

**Fig. S2** (A-D) AFM images for size and width study of Cu<sub>2</sub>O-CuO@GQDs EHPs and GQDs along with corresponding height profile and 3D images with a scan scale bar of 2×2μm.

Randles–Sevcik equation <sup>1, 2</sup> have been used to calculate the electrochemically active surface area of different electrodes

$$I_p = (2.69 \times 10^5) n^{3/2} A C^* D^{1/2} \nu^{1/2} \quad (1)$$

Where  $n$  is electron transfer number,  $A$  is area of the electrode,  $D$  is diffusion coefficient,  $C^*$  is probe molecules concentration, and  $\nu$  is scan rate respectively. Now,  $D$  is  $7.60 (\pm 0.02) 10^{-6} \text{ cm}^2 \text{ s}^{-1}$ , the concentration of  $[\text{Fe}(\text{CN})_6]^{3-/4-}$  is  $2.0 \times 10^{-3} \text{ M}$  and the estimated electrochemical active surface area of Cu<sub>2</sub>O-CuO@GQDs/GCE ( $0.138 \text{ cm}^2$ ) is greater than GQDs/GCE ( $0.124 \text{ cm}^2$ ), Cu<sub>2</sub>O EHPs/GCE ( $0.100 \text{ cm}^2$ ) and bare GCE ( $0.0712 \text{ cm}^2$ ) respectively. The enhanced surface area of Cu<sub>2</sub>O-CuO@GQDs/GCE confirms the synergy effect of Cu<sub>2</sub>O EHPs and GQDs to offer an active podium in smoothing electron transport between electrodes and the target solution.

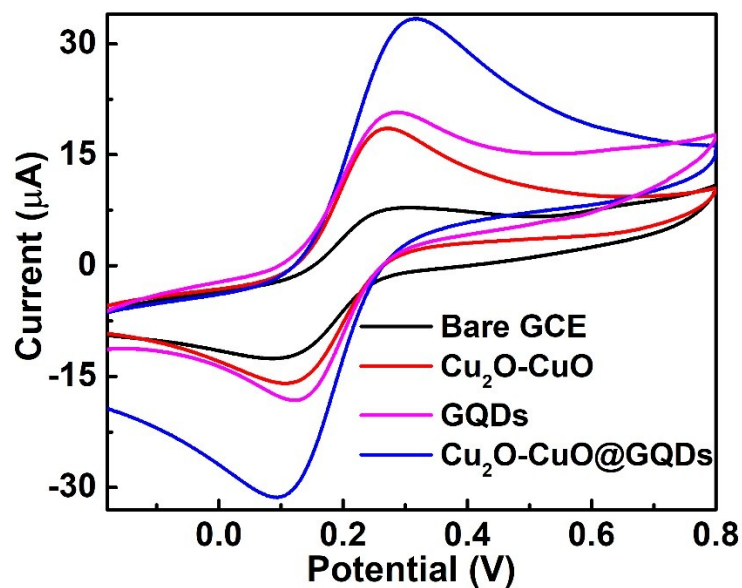

**Fig. S3.** CV curves of bare GCE, Cu<sub>2</sub>O-CuO, GQDs, and Cu<sub>2</sub>O-CuO@GQDs modified electrode in 0.1 M KCl solution with redox probe of (1:1), [Fe(CN)<sub>6</sub>]<sup>3-/4-</sup>

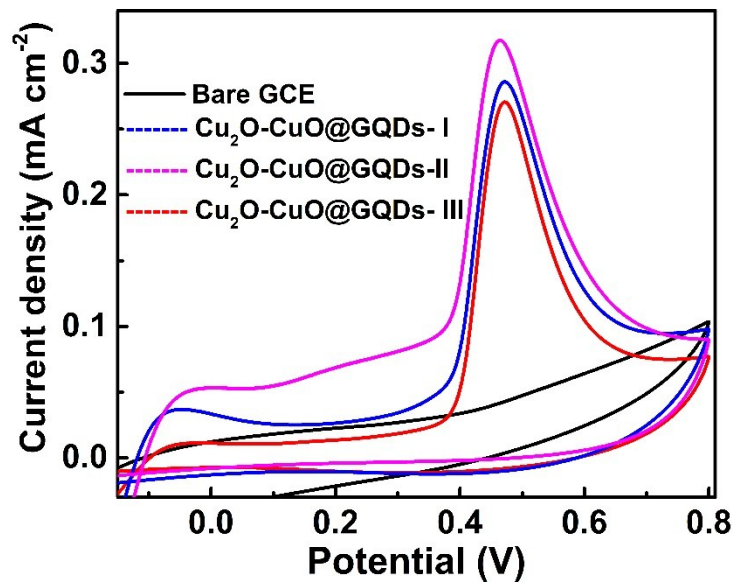

**Fig. S4.** CV curves of different modified electrodes in the presence of 0.1 M BPA solution

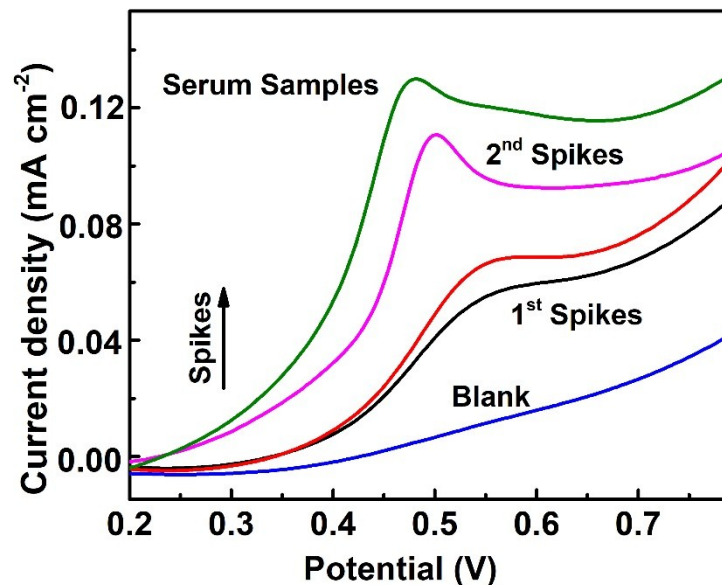

**Fig. S5.** DPV responses to human serum samples for BPA detection, 1<sup>st</sup> spikes correspond to 200 nM concentration spikes of BPA in breast cancer serum (black line) and cervical cancer serum (red line), 2<sup>nd</sup> spikes with 500 nM concentration spike of BPA in breast cancer serum (pink line) and cervical cancer serum (green line).

**Table S2.** Evaluation of various sensing systems for electrochemical detection of BPA based on nanomaterials stated in the literature.

| Electrode Material              | Technique   | LOD (nM) | Sensitivity ( $\mu\text{A mM}^{-1} \text{cm}^{-2}$ ) | Linear Range                        | Ref.      |
|---------------------------------|-------------|----------|------------------------------------------------------|-------------------------------------|-----------|
| Gr-AgCuNP/AuE                   | LSV         | 110      | -                                                    | 0.1-100 $\mu\text{M}$               | 3         |
| AuNP/MWCNT/GCE                  | DPV         | 4.3      | 137                                                  | 0.01-0.7 $\mu\text{M}$              | 4         |
| Na-doped $\text{WO}_3$ /CPE     | DPV         | 28       | 310                                                  | 0.0810–22.5 $\mu\text{M}$           | 5         |
| Tyrosinase/poly(thionine)/GCE   | Amperometry | 230      | -                                                    | 0.4-50 $\mu\text{M}$                | 6         |
| Tyr-MWCNT/PE                    | Amperometry | 100      | -                                                    | 1-16 $\mu\text{M}$                  | 7         |
| ILs-LDH/GCE                     | DPV         | 4.6      | -                                                    | 0.01-3 $\mu\text{M}$                | 8         |
| eMIP/e-NIP/SPCE                 | CV          | 0.06     | -                                                    | -                                   | 9         |
| MIP/GCE                         | DPV         | 0.02     | -                                                    | 1 $\mu\text{M}$ - 400 $\mu\text{M}$ | 10        |
| ZrO <sub>2</sub> /ZSM-5/GCE     | DPV         | 3        | -                                                    | 6 nM -600 $\mu\text{M}$             | 11        |
| Cu <sub>2</sub> O-CuO@GQDs EHPs | DPV         | 1        | 636                                                  | 2 nM-11 mM                          | This work |

We have investigated the various key features for purposed electrochemical sensing system such as sensitivity, the limit of detection and linear range. The modified Cu<sub>2</sub>O-CuO@GQDs/GCE obtained the lowest real detection of 1 nM limit in non-enzymatic sensors employed for BPA oxidation. The excellent sensitivity (636  $\mu\text{A mM}^{-1} \text{cm}^{-2}$ ) modified by present sensors proved better against various sensors reported previously. In the case of selectivity, the modified GCE exhibited outstanding anti-interference aptitude against various potential biomolecules that could possibly co-exist with BPA in blood. The amperometric response records displayed the linear increase in peak current values with increasing BPA concentration range from (2 nM to 11 mM) which is even superior to any other electrochemical system reported previously.

**Table S3** Comparison of the proposed biosensor with standard HPLC method to detect BPA in real environmental samples and biological fluids.

| Method           | Sample   | Spiked <sup>c</sup> ( $\mu\text{M}$ ) | Detected <sup>d</sup> ( $\mu\text{M}$ ) | RSD  | Recovery (%) |
|------------------|----------|---------------------------------------|-----------------------------------------|------|--------------|
| ECS <sup>a</sup> | Mineral  | 0                                     | 0                                       | 0    | --           |
|                  | Water    | 0.2                                   | $0.23 \pm 0.22$                         | 3.21 | 115          |
|                  |          | 0.5                                   | $0.52 \pm 0.13$                         | 0.82 | 104          |
|                  | Tap      | 0                                     | 0                                       | 0    | --           |
|                  | Water    | 0.2                                   | $0.19 \pm 0.14$                         | 2.22 | 95           |
|                  |          | 0.5                                   | $0.52 \pm 0.16$                         | 1.83 | 104          |
|                  | Healthy  | 0                                     | 0                                       | 0    | --           |
|                  | Serum    | 0.2                                   | $0.19 \pm 0.12$                         | 2.79 | 95           |
|                  |          | 0.5                                   | $0.53 \pm 0.15$                         | 2.77 | 106          |
|                  |          | 0                                     | 0                                       | 0    | --           |
|                  | Breast   | 0.2                                   | $0.22 \pm 0.11$                         | 1.31 | 110          |
|                  | Cancer   | 0.5                                   | $0.47 \pm 0.22$                         | 1.28 | 94           |
|                  |          | 0                                     | 0                                       | 0    | --           |
|                  | Cervical |                                       |                                         |      |              |

|                   |          |     |             |      |     |
|-------------------|----------|-----|-------------|------|-----|
| HPLC <sup>b</sup> | Cancer   | 0.2 | 0.21 ± 0.13 | 0.81 | 105 |
|                   |          | 0.5 | 0.55 ± 0.29 | 0.27 | 111 |
|                   | Mineral  | 0   | 0           | 0    | --  |
|                   | Water    | 0.2 | 0.21 ± 0.13 | 1.21 | 105 |
|                   |          | 0.5 | 0.56 ± 0.11 | 0.75 | 112 |
|                   | Tap      | 0   | 0           | 0    | --  |
|                   | Water    | 0.2 | 0.24 ± 0.24 | 1.35 | 120 |
|                   |          | 0.5 | 0.54 ± 0.19 | 0.85 | 108 |
|                   | Healthy  | 0   | 0           | 0    | --  |
|                   | Serum    | 0.2 | 0.21 ± 0.11 | 0.31 | 105 |
|                   |          | 0.5 | 0.51 ± 0.22 | 0.56 | 102 |
|                   | Breast   | 0   | 0           | 0    | --  |
|                   | Cancer   | 0.2 | 0.24 ± 0.13 | 1.32 | 120 |
|                   |          | 0.5 | 0.52 ± 0.29 | 0.95 | 110 |
|                   | Cervical | 0   | 0           | 0    | --  |
|                   | Cancer   | 0.2 | 0.22 ± 0.12 | 0.44 | 110 |
|                   |          | 0.5 | 0.51 ± 0.15 | 0.38 | 102 |

<sup>a</sup>The electrochemical sensor. <sup>b</sup>High performance liquid chromatography (HPLC-1100, Agilent Inc.) with a reversed-phase column (Hypersil-ODS),  $\lambda$  at 254 nm and detector was UWD. A mixture of water and methanol (30:70) was used as mobile phase and 0.4 mL/minute flow rate.

<sup>c</sup>Diluted from 50  $\mu$ M stock solution at suitable serial dilutions with 0.1 M PBS as a supporting electrolyte. <sup>d</sup>An average value of five analogous measurements (n=5) with RSD  $\leq$  4%.

## References:

- 1 A. Aziz, M. Asif, M. Azeem, G. Ashraf, Z. Wang, F. Xiao and H. Liu, *Anal. Chim. Acta*, 2019, 1047, 197-207.
- 2 M. Asif, A. Aziz, H. Wang, Z. Wang, W. Wang, M. Ajmal, F. Xiao, X. Chen and H. Liu, *Microchim. Acta*, 2019, 186, 61.
- 3 F. Pogacean, A. R. Biris, C. Socaci, M. Coros, L. Magerusan, M.-C. Rosu, M. D. Lazar, G. Borodi and S. Pruneanu, *Nanotechnology*, 2016, 27, 484001.
- 4 N. B. Messaoud, M. E. Ghica, C. Dridi, M. B. Ali and C. M. Brett, *Sens Actuat. B: Chemical*, 2017, 253, 513-522.
- 5 Y. Zhou, L. Yang, S. Li and Y. Dang, *Sens Actuat. B: Chemical*, 2017, 245, 238-246.
- 6 E. Dempsey, D. Diamond and A. Collier, *Biosens. Bioelectron.* 2004, 20, 367-377.
- 7 D. G. Mita, A. Attanasio, F. Arduini, N. Diano, V. Grano, U. Bencivenga, S. Rossi, A. Amine and D. Moscone, *Biosens. Bioelectron.* 2007, 23, 60-65.
- 8 T. Zhan, Y. Song, X. Li and W. Hou, *Mater. Sci. Engineering: C*, 2016, 64, 354-361.
- 9 V. M. Ekomo, C. Branger, R. Bikanga, A. M. Florea, G. Istamboulie, C. Calas-Blanchard, T. Noguer, A. Sarbu and H. Brisset, *Biosens. Bioelectron.* 2018, 112, 156-161.
- 10 T. S. Anirudhan, V. S. Athira and V. Chithra Sekhar, *Polymer*, 2018, 146, 312-320.
- 11 B. Kaur, B. Satpati and R. Srivastava, *RSC Advances*, 2016, 6, 65736-65746.
